# Supplementary material for: Arabidopsis guard cell chloroplasts import cytosolic ATP for starch turnover and stomatal opening
Source: PubMed Central journal article supplement (PMC8814037; doi:10.1038/s41467-022-28263-2), 2022-02-03
Supplement: 41467_2022_28263_MOESM1_ESM.pdf [file 41467_2022_28263_MOESM1_ESM.pdf]

**Supplementary Information for**

**Arabidopsis guard cell chloroplasts import cytosolic ATP for starch turnover and stomatal opening**

*Lim et al.*

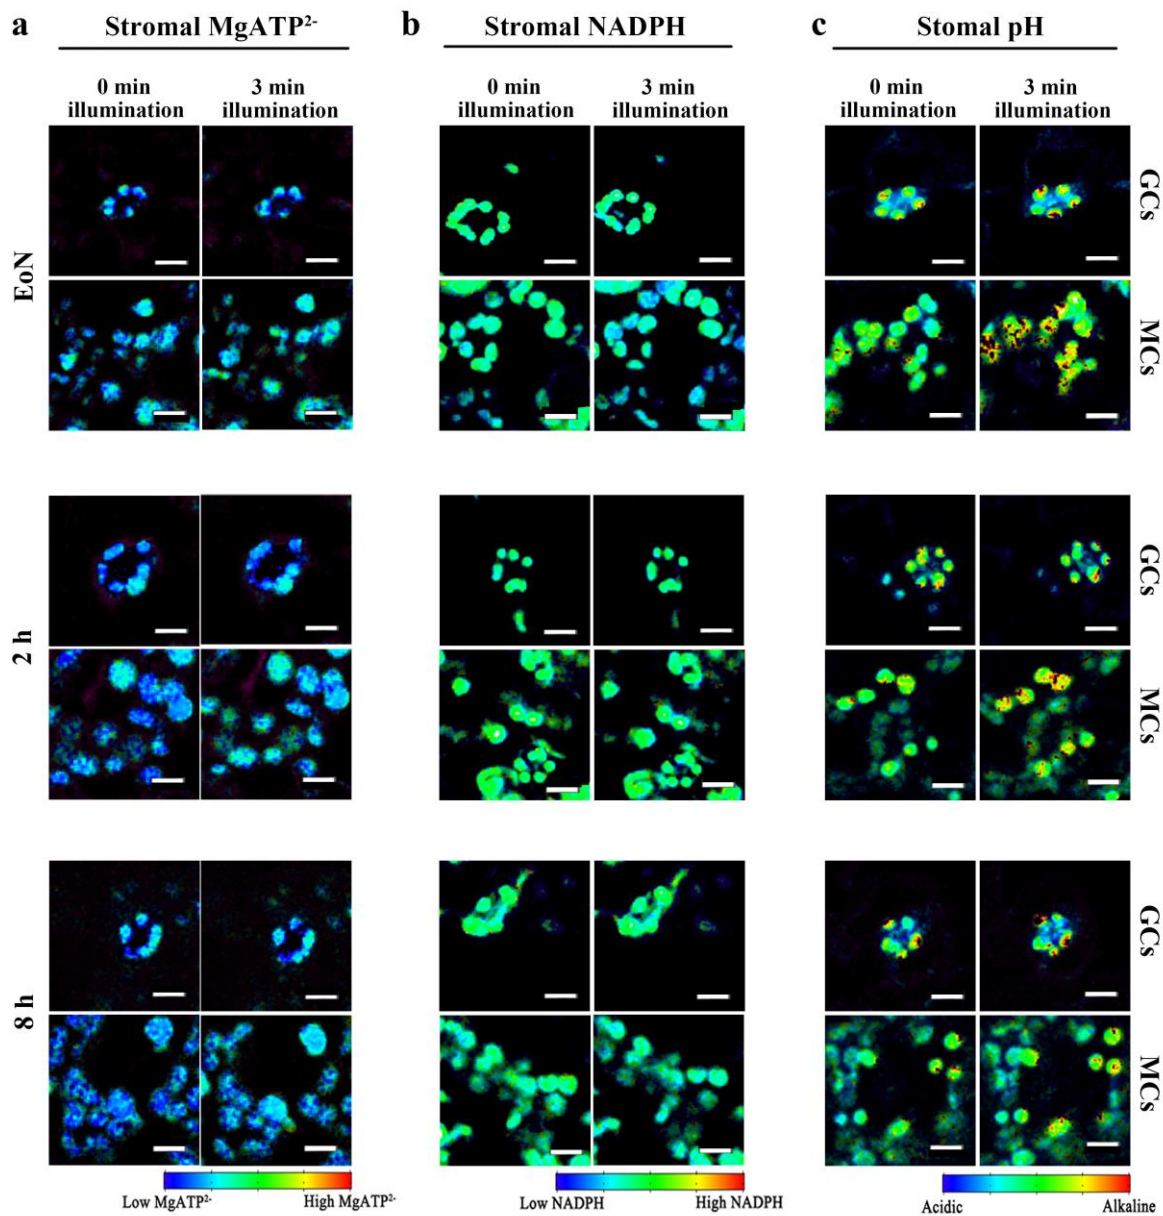

**Supplementary Figure 1. Light responses of stromal MgATP<sup>2-</sup>, NADPH and pH sensors in mesophyll cells and guard cells.** Representative confocal microscopy ratiometric images of mesophyll cell chloroplasts (MCCs) and guard cells chloroplasts (GCCs) of 20- to 22-day-old plants before and after 3 min of illumination at 216  $\mu\text{mol m}^{-2} \text{s}^{-1}$ . **a**, Stromal AT1.03, **b**, Stromal iNAP4 and **c**, Stromal cpYFP signals were collected at different time points (EoN, 2 h and 8 h into the day). **EoN**, End of night. Scale bars, 10  $\mu\text{m}$ . This experiment was repeated two times independently. Ratios of the Venus/CFP, raw iNAP4 ratio and cpYFP ratio images are represented in pseudo colour.

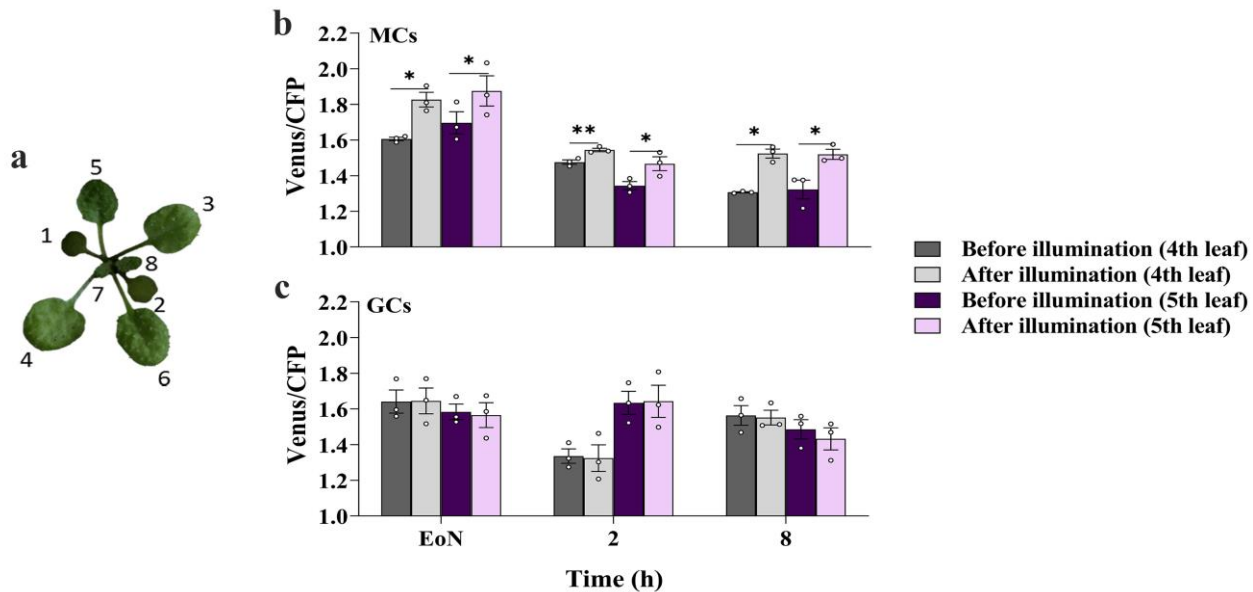

**Supplementary Figure 2. Stromal ATP generation in leaves of different developmental stages.**

**a**, Photograph of a representative Arabidopsis 21-day-old plant. Signals of the stromal ATP sensor AT1.03 in mesophyll cells (MCs) and guard cells (GCs) of young (5<sup>th</sup> leaf) and mature leaves (4<sup>th</sup> leaf) collected at the EoN and after 2 h or 8 h of illumination. A fluence rate of 216  $\mu\text{mol m}^{-2} \text{s}^{-1}$  white light was applied for 3 min after the first image was captured at the indicated time points. **b**, AT1.03 signal from the plastid stroma in MCs, (p-values of panel b (4<sup>th</sup> leaf MCs): EoN =  $2.8 \times 10^{-3}$ , 2 h = 0.006, and 8 h = 0.016; 5<sup>th</sup> leaf MCs : EoN = 0.017, 2 h = 0.018, and 8 h = 0.043), and **c**, AT1.03 signal from the plastid stroma in GCs. **EoN**, End of night. Asterisks indicate significant statistical differences ( $*P < 0.05$ ,  $**P < 0.01$ ) before and after 3 min of illumination, as determined by paired *t*-test, two-tailed ( $n = 3$ ; error bars  $\pm$  SEM). Source data are provided as a source data file.

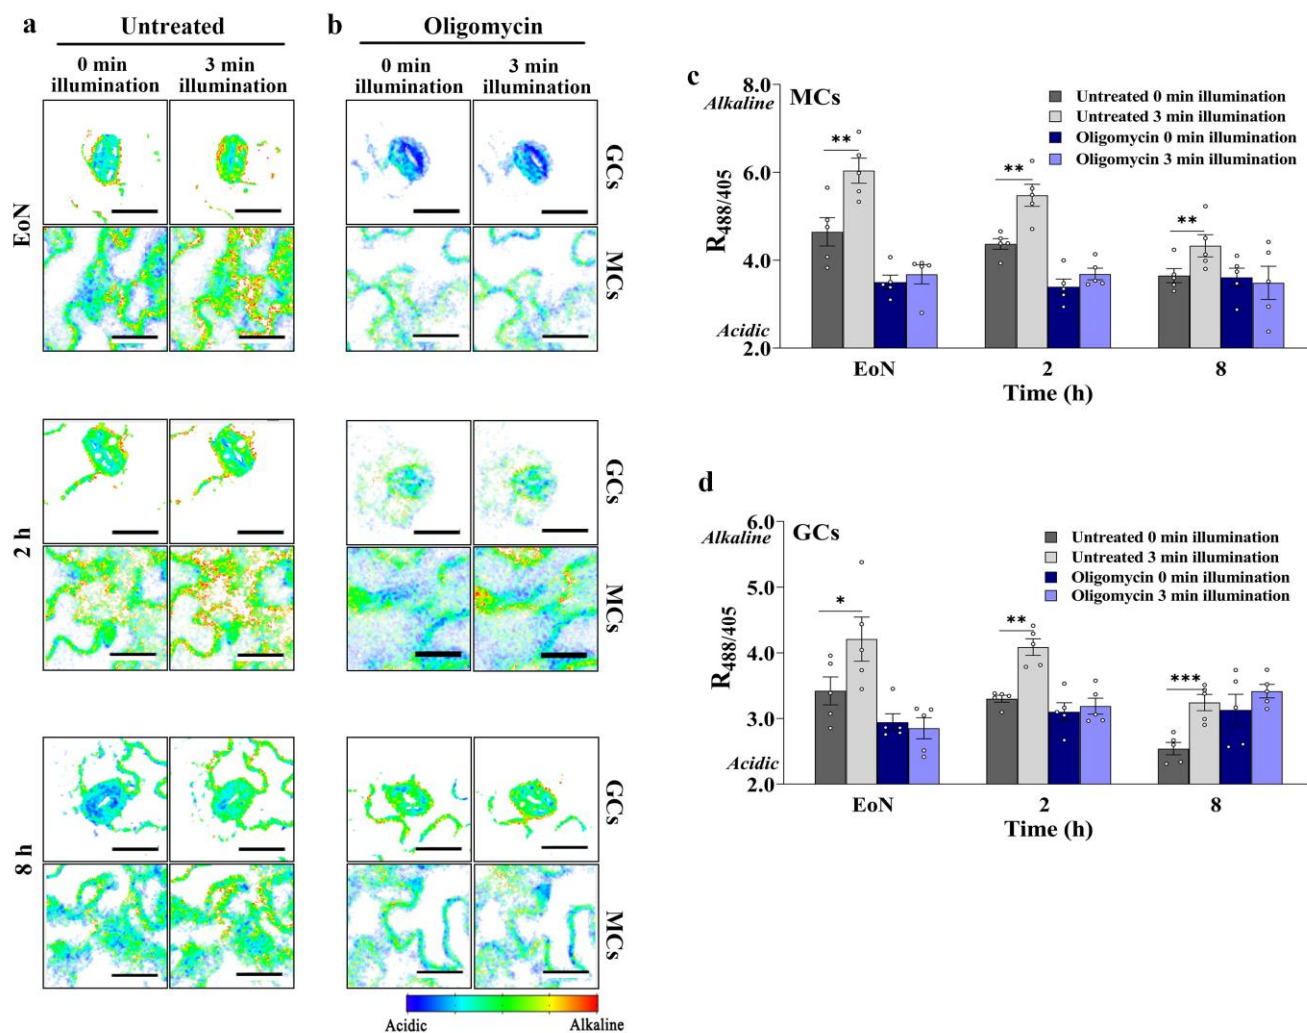

**Supplementary Figure 3. Ratiometric images of cytosolic cpYFP expressed in mesophyll cells and guard cells before and after 3 min of illumination.**

**a–b**, Mature leaves (4<sup>th</sup> leaf) of 20- to 22-day-old plants expressing cytosolic cpYFP were imaged at different time points (EoN, 2 h and 8 h into the day) **a**, Without or **b**, with 0.01 mM oligomycin pre-treatment and illumination with  $216 \mu\text{mol m}^{-2} \text{s}^{-1}$  white light for 3 min after the first image was captured at 0 min. The images are displayed in pseudo colours. Scale bars, 20  $\mu\text{m}$ . **c–d**, Changes in cytosolic pH in mesophyll cells (MCs) and guard cells (GCs) of 20- to 22-day-old plants (4<sup>th</sup> leaf) transformed with TKTP-cpYFP (pH sensor) in response to white light illumination at  $216 \mu\text{mol m}^{-2} \text{s}^{-1}$  for 180 s in presence or absence of 0.01 mM oligomycin. Asterisks (\*) indicate significant statistical differences ( $*P < 0.05$ ,  $**P < 0.01$ ,  $***P < 0.001$ ) as determined by paired *t*-test, two-tailed ( $n = 5$ ; mean  $\pm$  SEM); p-values of panel c: MCs EoN = 0.01, MCs 2 h = 0.007, and MCs 8 h = 0.006; p-values of panel d: GCs EoN = 0.034, GCs 2 h = 0.002, and GCs 8 h =  $0.8 \times 10^{-4}$ . **EoN**, End of night. Source data are provided as a source data file.

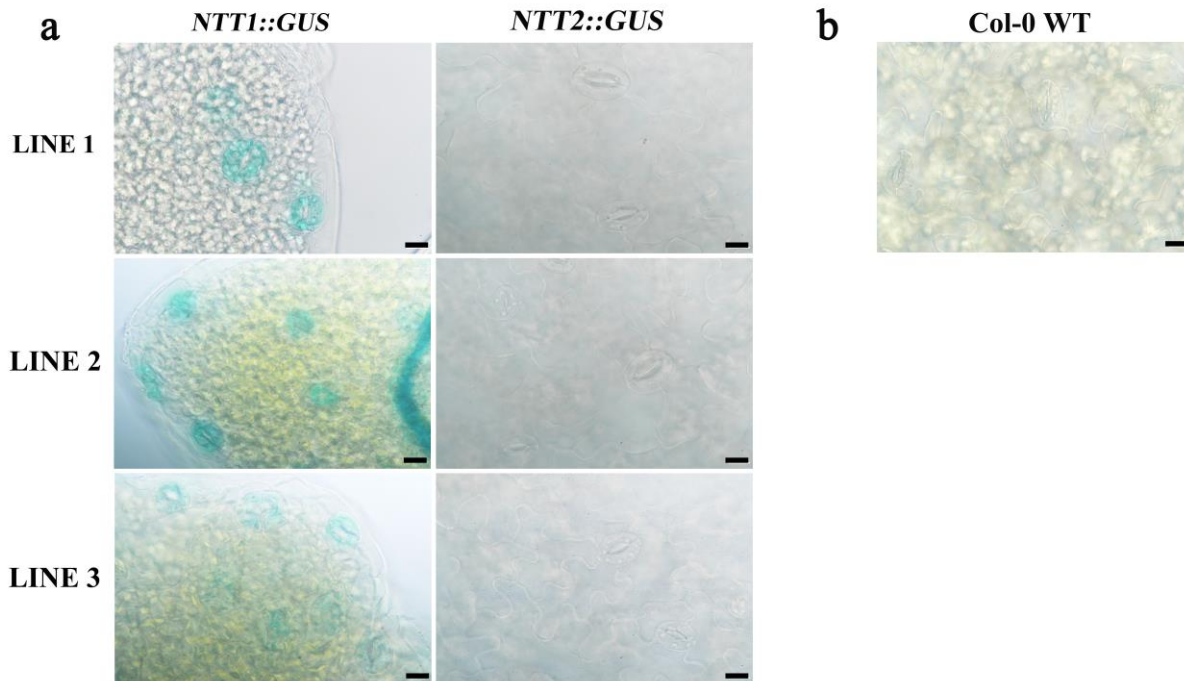

**Supplementary Figure 4. Histochemical localization of *GUS* expression of *NTT* promoters in Arabidopsis seedling.**

**a**, *NTT1* promoter::*GUS* and *NTT2* promoter::*GUS* activity in 21-day-old seedlings. **b**, Wild type (Col-0 WT) acts as control. This experiment was repeated three times independently. Scale bar, 10 $\mu$ m.

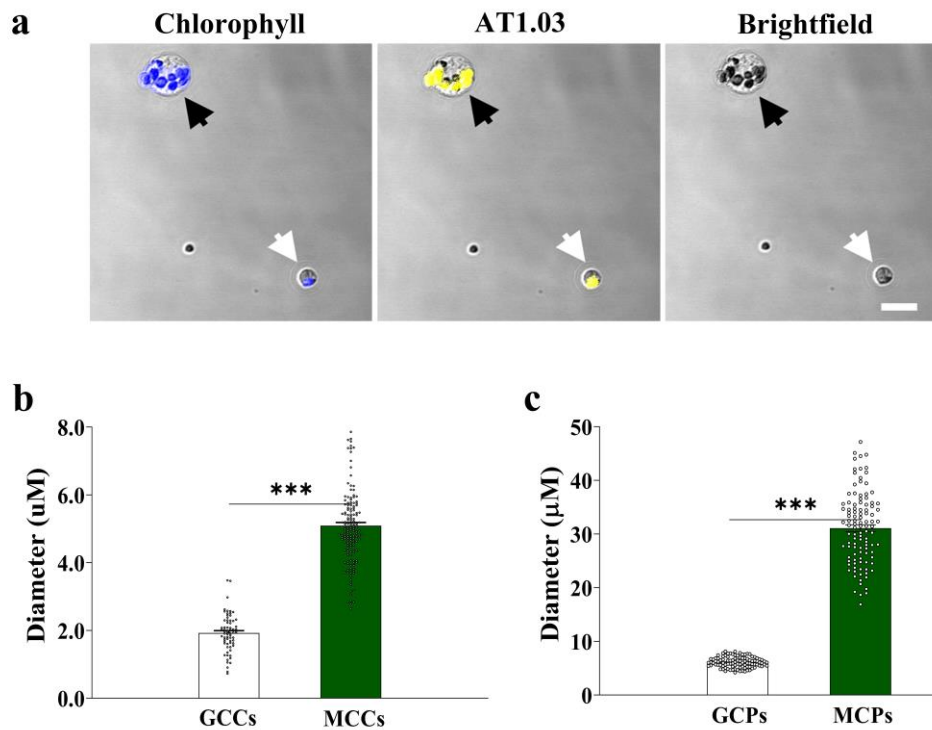

**Supplementary Figure 5. Size comparison between protoplasts and chloroplasts isolated from guard cells and mesophyll cells.**

**a**, Representative images of isolated guard cell protoplasts (GCPs, white arrow) and mesophyll cell protoplasts (MCPs, black arrow). Fluorescence images of chlorophyll fluorescence (Chlorophyll), Venus/CFP ratios (AT1.03), and transmitted light (Brightfield) are presented. Scale bar, 10  $\mu\text{m}$ . **b**, Diameter of guard cell chloroplasts (GCCs) and mesophyll cell chloroplasts (GCCs;  $n = 68$  and 163, respectively; mean  $\pm$  SEM of two independent experiments). Asterisks indicate statistically significant differences ( $***P < 0.001$ ) between the diameters ( $\mu\text{m}$ ) of chloroplasts of GCs and MCs and protoplasts of GCs and MCs, as determined by unpaired  $t$ -test, two-tailed (p-value of panel b: GCCs vs. MCCs =  $3.3 \times 10^{-74}$ ). **c**, Diameter of GCPs and MCPs ( $n = 99$  and 107, respectively; mean  $\pm$  SEM of two independent experiments; p-value of panel c: GCPs vs. MCPs =  $5.4 \times 10^{-66}$ ). Asterisks indicate statistically significant differences ( $***P < 0.001$ ) between the diameters ( $\mu\text{m}$ ) of chloroplasts of GCs and MCs and protoplasts of GCs and MCs, as determined by unpaired  $t$ -test, two-tailed. Source data are provided as a source data file.



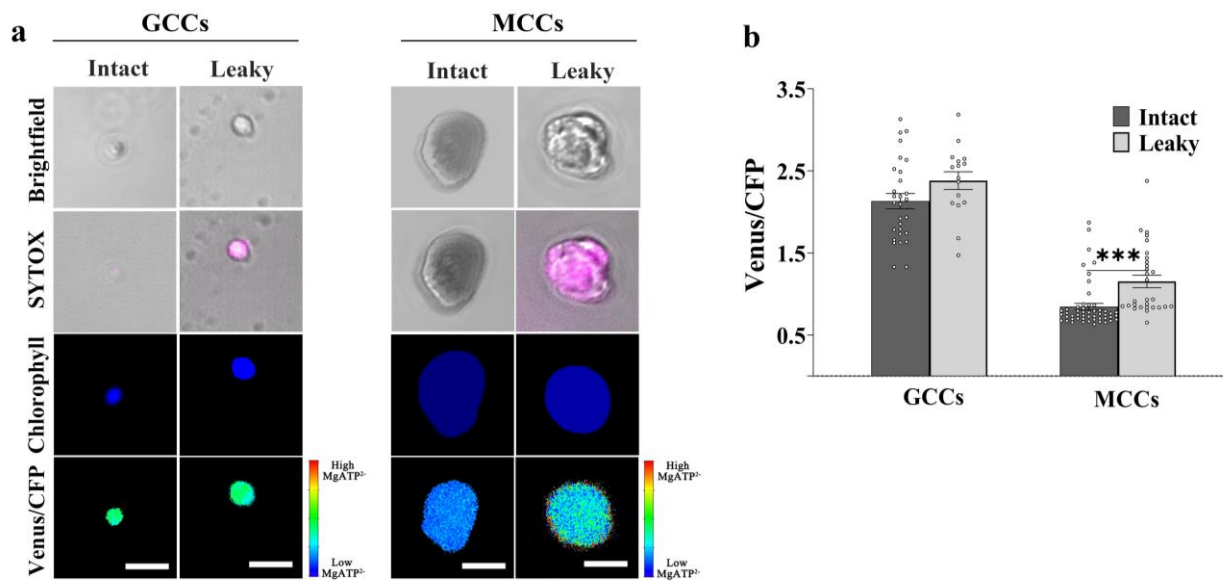

**Supplementary Figure 6. Integrity of protoplasts and chloroplasts of mesophyll cells and guard cells.**

**a–b**, Intact and leaky guard cell chloroplasts (GCC) and mesophyll cell chloroplasts (MCC) expressing TKTP-AT1.03. Leaky chloroplasts were stained with SYTOX<sup>TM</sup> orange and incubated with 5 mM ATP. Fluorescence images of transmitted light (brightfield), chlorophyll fluorescence (chlorophyll), SYTOX orange fluorescence (SYTOX), and Venus/CFP ratios (FRET) of chloroplasts are presented. FRET ratios and the corresponding SYTOX orange intensities of chloroplasts are displayed in the graph. The Asterisks indicate significant statistical differences ( $***P < 0.01$ ) between intact and leaky chloroplasts, as determined by unpaired *t*-test, two-tailed ( $n = 29, 16, 51$  and  $29$ , respectively; mean  $\pm$  SEM) (p-value of panel b: MCCs = 0.001). Lower FRET ratio is expected in the chloroplasts with SYTOX orange stain as the stain absorbs the FRET emission at 526–545 nm. Scale bars, 5  $\mu$ m. MgATP<sup>2-</sup> FRET ratios are represented by pseudo colour images, where higher ratios (red) correspond to higher MgATP<sup>2-</sup> levels. Source data are provided as a source data file.

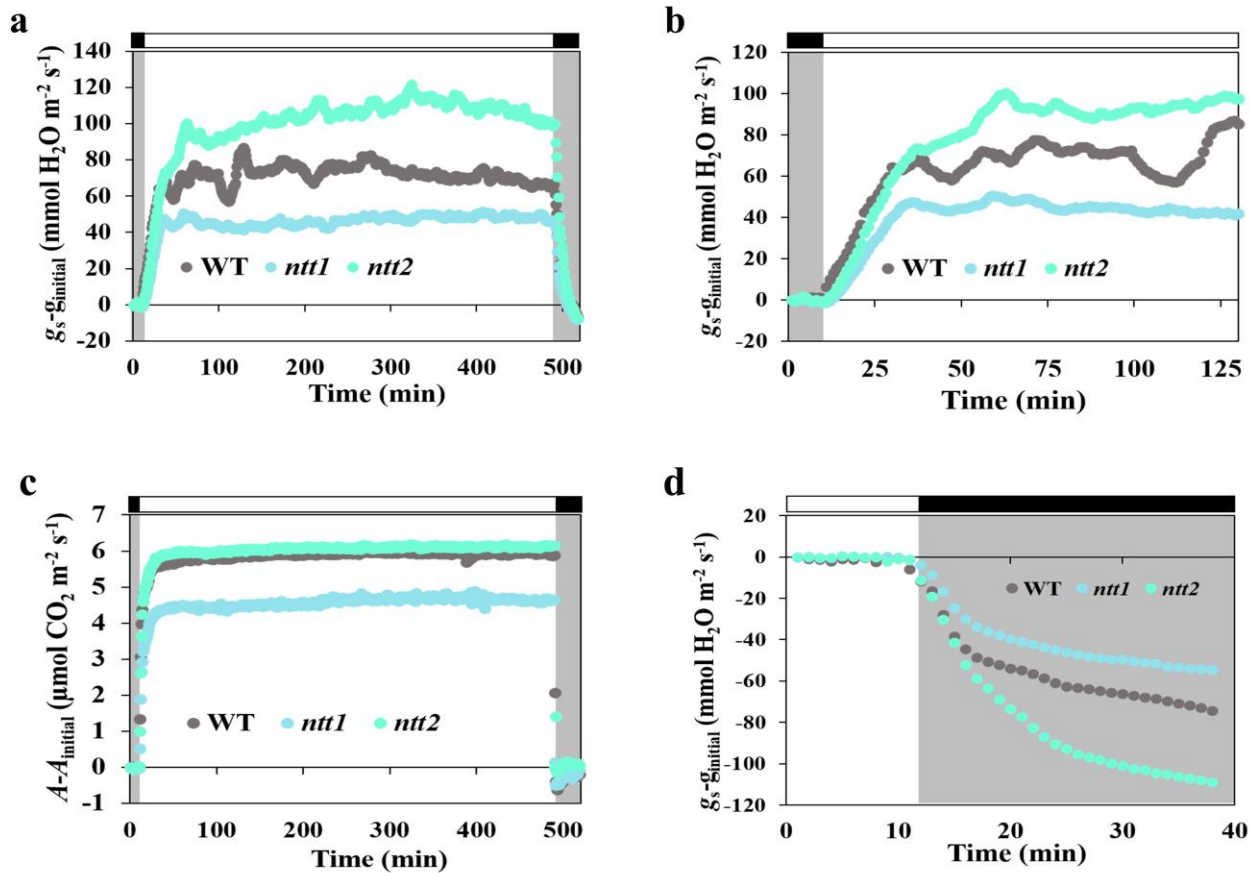

**Supplementary Figure 7. Whole-plant recordings of gas exchange measurements of wild-type, *ntt1* and *ntt2* plants.**

**a**, Normalized whole-plant recordings of changes in stomatal conductance ( $g_s$ ) of wild-type, *ntt1* and *ntt2* plants. Data shown are mean  $\pm$  SEM;  $n = 3$  per genotype. Plants have been illuminated with  $150 \mu\text{mol m}^{-2} \text{s}^{-1}$  white light after end of night (EoN) under ambient-air CO<sub>2</sub> concentrations for 8 h.  $g_s$  values were normalized to values at EoN ( $0 = g_{s_{\text{initial}}}$ ). **b**, Changes in  $g_s - g_{s_{\text{initial}}}$  values in response to a shift from dark to light in wild-type, *ntt1* and *ntt2* plants. Data are replotted from normalized  $g_s$  plot. **c**, Normalized whole-plant recordings of changes in CO<sub>2</sub> assimilation ( $A$ ) of wild-type, *ntt1* and *ntt2* plants. Data shown are mean  $\pm$  SEM;  $n = 3$  per genotype. Plants were illuminated with  $150 \mu\text{mol m}^{-2} \text{s}^{-1}$  white light after EoN under ambient-air CO<sub>2</sub> concentrations for 8 h.  $A$  values were normalized to values at EoN ( $0 = A_{\text{initial}}$ ). **d**, Changes in  $g_s - g_{s_{\text{initial}}}$  values in response to a shift from light to dark in wild-type, *ntt1* and *ntt2* plants. Data are replotted from the normalized  $g_s$  plot. Data shown are mean  $\pm$  SEM;  $n = 3$  per genotype. Source data are provided as a source data file.



**Supplementary Table 1. Primer sequences used for RT-qPCR**

| Gene        | AGI code  | Forward primer       | Reverse primer         | PCR efficiency | Reference                    |
|-------------|-----------|----------------------|------------------------|----------------|------------------------------|
| <i>ACT2</i> | At3g18780 | CGTACAACCGGTATTGTGCT | GTAATCAGTAAGGTCACGTCCA | 2.06           | Horrer, Flütsch <sup>1</sup> |
| <i>NTT1</i> | At1g80300 | TAAGTCGCTGGAGGGACAGT | TTCGTCCTGAGACACGACAG   | 2.07           | Selinski, König <sup>2</sup> |
| <i>NTT2</i> | At1g15500 | TTATGGGCGACTTCTCAACC | AAGGCAACACCGGTCAATAG   | 2.14           | Selinski, König <sup>2</sup> |

**Supplementary Table 2. Primer sequences used for plasmid construction**

| Primer                 | Sequence (5'-3')                                | Reference                  |
|------------------------|-------------------------------------------------|----------------------------|
| <i>AtNTT1</i> -Forward | gaccatgattacccaagcttTGGACCTACATATGGGTTTCGATT    | Reiser, Linka <sup>3</sup> |
| <i>AtNTT1</i> -Reverse | ataagggactgaccaccgggCTCTCTATTTCACTCTCTCCCGCA    | Reiser, Linka <sup>3</sup> |
| <i>AtNTT2</i> -Forward | gaccatgattacccaagcttGGAAGAATCTGAAGTTTTGGAACC    | Reiser, Linka <sup>3</sup> |
| <i>AtNTT2</i> -Reverse | ataagggactgaccaccgggCTCTCTATCTCTCACGTAGCACACTGA | Reiser, Linka <sup>3</sup> |

**References**

1. Horrer D, *et al.* Blue light induces a distinct starch degradation pathway in guard cells for stomatal opening. *Curr Biol* **26**, 362-370 (2016).
2. Selinski J, *et al.* The plastid-localized NAD-dependent malate dehydrogenase is crucial for energy homeostasis in developing *Arabidopsis thaliana* seeds. *Molecular plant* **7**, 170-186 (2014).
3. Reiser J, Linka N, Lemke L, Jeblick W, Neuhaus HE. Molecular physiological analysis of the two plastidic ATP/ADP transporters from *Arabidopsis*. *Plant Physiol* **136**, 3524-3536 (2004).
