# Supplementary material for: Arabidopsis guard cell chloroplasts import cytosolic ATP for starch turnover and stomatal opening
Source: PubMed Central journal article supplement (PMC8814037; doi:10.1038/s41467-022-28263-2), 2022-02-03
Supplement: 41467_2022_28263_MOESM2_ESM.pdf [file 41467_2022_28263_MOESM2_ESM.pdf]

## Peer Review File

---

Arabidopsis guard cell chloroplasts import cytosolic ATP for starch turnover and stomatal opening

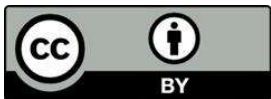

**Open Access** This file is licensed under a Creative Commons Attribution 4.0 International License, which permits use, sharing, adaptation, distribution and reproduction in any medium or format, as long as you give appropriate credit to the original author(s) and the source, provide a link to the Creative Commons license, and indicate if changes were made. In the cases where the authors are anonymous, such as is the case for the reports of anonymous peer reviewers, author attribution should be to 'Anonymous Referee' followed by a clear attribution to the source work. The images or other third party material in this file are included in the article's Creative Commons license, unless indicated otherwise in a credit line to the material. If material is not included in the article's Creative Commons license and your intended use is not permitted by statutory regulation or exceeds the permitted use, you will need to obtain permission directly from the copyright holder. To view a copy of this license, visit <http://creativecommons.org/licenses/by/4.0/>.

<b>REVIEWER COMMENTS</B>

Reviewer #1 (Remarks to the Author):

The paper from Lim, Flütsch and collaborators have investigated the function of guard cell chloroplasts (GCCs). Guard cells (GCs) have lower chloroplast/mitochondria ratio and very low level of chlorophyll, when compared to mesophyll cells (MCs). The plastidial photosynthetic activity was initially proposed to be absent in GCs. However, several recent works showed that GCCs are important for the regulation of stomatal opening, but the exact function of GCCs remain unclear. Thus, the work from Lim, Flütsch and collaborators is timely and address a long-debated question. By using different state of art techniques, the authors provide important information regarding ATP metabolism in GCs. However, the data produced do not support the conclusion that the major function of GCCs is to store starch and not to make photosynthesis. Contrary to this idea, the lack of starch synthesis under DCMU indicates a prominent role of photosynthesis in GCCs for starch synthesis.

I think the novelties and the main conclusions of the work should be:

- Mitochondria is the primary source of ATP for GCs
- GCCs import ATP through NTT, which is crucial for starch metabolism
- GCCs has considerable levels of both ATP and NADPH, despite low plastidial photosynthetic activity, as evidenced by the lack in increases in both ATP and NADPH upon illumination

Below the authors can find a thorough review of the work, with several suggestions to improve the text and the conclusions taken from the data.

Abstract: After reading the abstract, I don't see any result that confirm the affirmation found in the title of the work. Given the low level of chlorophyll found in GCs, no one is expecting high quantities of ATP and NADPH to be produced in this cell type.

Introduction: The introduction section has several erroneous concepts and misleading sentences. Furthermore, it didn't bring the hypothesis, aims and why this work is timely. The introduction is thus vague and contains out of date concepts. See below in detail.

Lines 19-20: "It remains controversial whether GCCs carry out photosynthesis." Not sure this assumption is correct. There are plenty of works showing that GCCs do photosynthesize. This idea is supported by the identification of rubisco in guard cell protoplasts by proteomics, by fluxomics studies and physiological measurements. The controversial idea is maybe based in the work from Outlaw (Outlaw et al., 1979).

Lines 33-34: "becomes turgid through the influx of potassium (K<sup>+</sup>), chloride (Cl<sup>-</sup>) and nitrate (NO<sub>3</sub><sup>-</sup>) ions, malate (Mal<sup>2-</sup>) and sugars" Is there any evidence showing that the influx of sugars makes GCs turgid? Perhaps the authors are basing in the role of sugars as osmolyte proposed by Zeiger and collaborators (Talbot & Zeiger, 1996), but this is solely based in correlation analysis. Alternatively, the authors are based in the results from Flütsch et al (Flütsch et al., 2020), in which reduced sugar transport reduced gs in Arabidopsis. None of these works have showed that sugars change the turgescence of GCs. Additionally, there are several works showing that exogenous sugar application leads to stomatal closure, meaning that sugars (and malate) can possibly decrease the turgescence of GCs.

Lines 43-44: "stomatal opening is energetically costly, consuming substantial amounts of cytosolic ATP 6" The authors cite a review here. It would be better to cite the original work that support such information.

Results:

Figure 1: I suggest comparing MCs and GCs in each time point.

If GCCs chloroplast function is not related to photosynthesis, why the NADPH level is higher at EoN and 3 min after illumination in GCs than MCs?

From EoN to 2 h, there is a decrease in both NADPH and ATP, suggesting a consumption of these components. Indeed, this is a critical period for stomatal opening. However, from 2h to 8 h, there is an increase in stromal ATP, this isn't an indication of photosynthetic activity?

Lines 86-87: "Given that the number of chloroplasts and the ratio of chloroplasts to mitochondria are much lower in GCs than in mesophyll cells 1,23" The reference 1 is a review. Please cite the original work that confirm it. Perhaps Willmer & Fricker has this information (Willmer & Fricker, 1996).

Lines 91-94: “By contrast, inhibitors of complex I (rotenone) and complex II (thenoyltrifluoroacetone, TTFA) of the mitochondrial transport chain partially decreased cytosolic ATP levels in mesophyll cells but had no significant effect on ATP levels in GCs (Supplementary Fig. 6a, b).” The trend is very similar among MCs and GCs. I think the best test here should be Dunnett, not Tukey, given that there is a clear control in the experiment (untreated cells).

Line 95: “These data suggest that mitochondria are the primary source of ATP for GCs” This is an outstanding result that solve a long debate. The authors should explore more this data in the discussion

Lines 103-104: “Given that plants expressing the TKTP-iNAP4 sensor in GCCs did not produce detectable amounts of NADPH in response to light” Sorry I’m lost here. This sentence is not supported by the Fig 1d. Did I miss something? Perhaps the authors want to state that not noticeable increases in NADPH was observed.

Lines 103-104: “These results further suggest that chloroplasts in both cell types contain substantial amounts of NADPH in the dark.” The amount of NADPH is much higher in guard cells. This should be discussed

Fig 2e. I’m wondering why the authors didn’t make kinetics of this analysis, such as in their previous work in PNAS

Lines 145-146: “DCMU inhibited starch accumulation in both WT and *stp1stp4* isolated GCs, indicating that GC photosynthesis at least partly contributed to starch synthesis (Fig. 3c).” The take home message here is clear: photosynthesis is crucial for starch synthesis, which is a paradox with the conclusions and the tittle of the work.

Fig. 3d. The protoplast of GCs is much lower than MCs. Thus, the expected is that the level of proteins will be lower than MCs. This data should be normalized to make this comparison a fair one. Perhaps the size of protoplasts or the level of chlorophyll can be used for the normalization.

Figures 3 g and h were not cited in the results section.

Discussion:

Lines 169-172: “The data presented here provide novel insights into how starch metabolism in GCs integrates and how GCCs obtain energy and carbon for starch metabolism when they do not generate sufficient ATP or NADPH during illumination nor fix substantial amount of CO<sub>2</sub> through the CBB pathway.” The authors haven’t measured CO<sub>2</sub> fixation. In general, the authors exacerbated and/or extrapolated their conclusions to unmeasured things.

Lines 176-178: “The ATP-dependent activation of the phototropin-H<sup>+</sup>-ATPase pathway triggers BL-dependent degradation of GC starch at the onset of illumination, which yields glucose, promoting rapid stomatal opening” I have two major concerns regarding this conclusion involving glucose. The major products exported from leaf plastidial starch degradation are maltose and glucose (Glc). It is unclear however which one (Glc or maltose) is the major product from starch breakdown in GCs. Evidence suggests that maltose and maltotriose are the main products of GC starch degradation (Talbot & Zeiger, 1993). Given that Flütsch et al. did not measure maltose, we cannot rule out the hypothesis that maltose is the main product of starch degradation released from GCCs. Furthermore, assuming that Glc is the major metabolite derived from starch degradation, one would expect Glc levels to increase after starch degradation, including in WT. However, in their experiment, Glc levels were unaltered from dark (D)-to-BL transition in WT plants. Given that a substantial part of the Glc pool is probably rapidly degraded to activate glycolysis under this condition, only a time series data would detect such increase in Glc content. Thus, the Glc data from single point measurements coupled to the lack of maltose quantification do not fully support the conclusion that Glc is the major metabolite derived from starch degradation.

In summary, the results obtained by Flütsch et al and the current work show compelling evidence for the role of guard cell starch metabolism during light stomatal responses. However, their attempts to answer (i) what is the major product of starch degradation and (ii) what is the fate of the C released from starch breakdown need to be interpreted with caution.

Lines 178-179: “The ability of GCCs to produce ATP and NADPH is marginal (Fig. 1b, d)” I don’t see tremendous differences between MCs and GCs in both ATP and NADPH levels. The NADPH seems even higher in GCs than MCs. The authors should rephrase this sentence or provide statistical comparison between the two cell types.

Lines 188-189: “Hence, the main function of GCCs is not photosynthesis or CO<sub>2</sub> fixation; rather, it is to serve as a reservoir of starch, which is essential for regulating stomatal opening” What are the evidence for this conclusion? Is not clear to me. I think the work provide evidence for the opposite conclusion: that photosynthesis is crucial for starch synthesis in illuminated GCs. This idea is based in the fact that DCMU treatment abolished starch synthesis in GCs.

Another major concern: GCs have several characteristics of sink cells and C4/CAM cells. Thus, in order to fully understand the function of GCCs, the authors should make a wider comparison, using source and sink MCs of the same plant and possibly MCs from other species.

References cited here:

Flütsch S, Nigro A, Conci F, Fajkis J, Thalmann M, Trtílek M, Panzarová K, Santelia D. 2020. Glucose uptake to guard cells via STP transporters provides carbon sources for stomatal opening and plant growth. *EMBO reports in press*: 1–13.

Outlaw WH, Manchester J, Dicamelli CA, Randall DD, Rapp B, Veith GM. 1979. Photosynthetic carbon reduction pathway is absent in chloroplasts of *Vicia faba* guard cells. *Proceedings of the National Academy of Sciences of the United States of America* 76: 6371–5.

Talbott LD, Zeiger E. 1993. Sugar and organic acid accumulation in guard cells of *Vicia faba* in response to red and blue light. *Plant Physiology* 102: 1163–1169.

Talbott LD, Zeiger E. 1996. Central Roles for Potassium and Sucrose in Guard-Cell Osmoregulation. *Plant physiology* 111: 1051–1057.

Willmer C, Fricker M. 1996. *Stomata*. London: Chapman & Hall.

Reviewer #2 (Remarks to the Author):

The MS by Lim et al explores the function of guard cell chloroplasts in *Arabidopsis*. Using a range of fluorescence protein sensors the authors monitored ATP and NADPH production in guard cells and compared the findings to mesophyll cells and concluded that photosynthetic electron transport is not responsible for the production of ATP required for stomatal opening to blue light. Using Nucleotide transporter mutants, they suggest that ATP is imported into guard cell chloroplasts and this is required for starch biosynthesis. From these findings the authors conclude that guard cell chloroplasts serve as a starch reservoir rather than carrying out photosynthesis.

This is an interesting MS as the role of guard chloroplasts has been debated for many years (although work by others in this area has not been included in the MS – see comment below). The authors have carried out a substantial amount of work and used a range of different approaches to explore guard cell chloroplast metabolism. Below I have outlined some comments to help improve the MS.

My main concern with the MS regards the use of only fluorescence probes to “quantify” the amounts of substances. These ratiometric probes can be extremely useful for cellular localization and provide some indicative measure of substances - however they are also subject to various limitations, with different re-absorption properties depending on the wavelength, pH and redox influences as well as detection. Furthermore, confocal microscopy can easily damage the material and probes due to photo bleaching episodes. Putting these caveats aside I am not entirely convinced by the differences between guard and mesophyll cell signals suggested by the authors. It is extremely difficult to see the differences between the mesophyll and the guard cells in Suppl Fig.1. This is supported by the fact that the absolute levels outlined in Fig. 1 and suppl Fig.2 are in very similar ranges and that only very small differences between the two cell types were observed when illuminated. This could be because the probes/sensors are saturated –did the authors test for this? These data are not convincing and it would be nice to see these supported by “actual” measurements rather than proxy measures.

How do the authors explain such high levels of NADPH in the dark?

The authors should explain exactly how the dyes work and include the known pitfalls with these radiometric dyes.

Why was 3-minute illumination chosen for these measurements?

What does high and low represent in the false colour images? This information should be included in the colour scale bar and are the scale bars the same for all images?

The authors present data illustrating that GC contain much lower amounts of CBB cycle enzymes than mesophyll. This is not new and has been demonstrated and discussed previously. GCs are 20x smaller than mesophyll was this taken into account?

Can the authors provide an explanation for the presence of Calvin cycle enzymes in the guard cells if no Calvin cycle activity is taking place? Fig. 3d – the authors show different amounts of starch produced in the ntt mutants compared with wild type – although the ntt1 and ntt2 mutants did not accumulate starch the stomata were still functional with only small differences in aperture observed, and stomata remained open for 8 h. What spectrum of light was used in these experiments?

The introduction does not fully cover the literature on guard cells photosynthesis – there are several reviews in this area that have not been included. The amount of information in the blue light pathway could be reduced to a few sentences and focus only on the fact that energy (ATP) is a key component of this pathway. Additionally the authors need to include more context to highlight why the information from this study is important.

The mutants need to be introduced fully to the reader. Difference between NTT1 and NTT2 etc.

Can the authors provide further explanations for the effect of complex I and II inhibitors relative to oligomycin on the effects of mitochondrial ATP production?

The authors demonstrate that guard cell electron transport does contribute to some production of starch and this should be included and discussed further in the discussion section.

All of the figure legends need to state which light spectra were used – blue, red or white light.

The discussion is a little repetitive of the results in places. It would be good to see further discussion on the context. Also the authors focus on BL stomatal responses – however what about the red light driven pathway – could guard cell metabolism be different under different conditions? It should be acknowledged that this work focuses specifically on the BL pathway.

Letter is missing from Fig. 3d.

The symbols in the graphs of Fig 3 are extremely difficult to distinguish between controls and treatments. I would recommend using filled and open symbols rather than various greys.

Suppl Fig. 7 – the untreated GC at 8 h in the dark appear at a similar YPF level as guard cells at time zero EoN guard cells – can the authors discuss these finding in greater detail?

Line 44 – substantial amounts – what is substantial?



1 The following new figures were added to the revised manuscript:

2 Fig. 2a-f, Fig. 3c-f, Fig. 5d-e, Supplementary Fig 7a-d.

### 3 **REVIEWER COMMENTS**

4

5 Reviewer #1 (Remarks to the Author):

6

7 The paper from Lim, Flütsch and collaborators have investigated the function of guard cell chloroplasts  
8 (GCCs). Guard cells (GCs) have lower chloroplast/mitochondria ratio and very low level of chlorophyll,  
9 when compared to mesophyll cells (MCs). The plastidial photosynthetic activity was initially proposed to  
10 be absent in GCs. However, several recent works showed that GCCs are important for the regulation of  
11 stomatal opening, but the exact function of GCCs remain unclear. Thus, the work from Lim, Flütsch and  
12 collaborators is timely and address a long-debated question. By using different state of art techniques, the  
13 authors provide important information regarding ATP metabolism in GCs. However, the data produced  
14 do not support the conclusion that the major function of GCCs is to store starch and not to make  
15 photosynthesis. Contrary to this idea, the lack of starch synthesis under DCMU indicates a prominent role  
16 of photosynthesis in GCCs for starch synthesis.

17 > We agree with the reviewer's comment. We revised the manuscript title to "Arabidopsis guard cell  
18 chloroplasts import cytosolic ATP for starch turnover and stomatal opening" and revised the text  
19 accordingly. Specifically, we now have a new paragraph in the result section entitled "DCMU inhibits  
20 starch synthesis in isolated GCs" (Line 211).

21

22 I think the novelties and the main conclusions of the work should be:

- 23 - Mitochondria is the primary source of ATP for GCs
- 24 - GCCs import ATP through NTT, which is crucial for starch metabolism
- 25 - GCCs has considerable levels of both ATP and NADPH, despite low plastidial photosynthetic activity,  
26 as evidenced by the lack in increases in both ATP and NADPH upon illumination.

27 > The reviewer correctly points out the main conclusions of our work. In the revised discussion, we  
28 discuss them in much greater details.

29

30 Below the authors can find a thorough review of the work, with several suggestions to improve the text  
31 and the conclusions taken from the data.

32

33 Abstract: After reading the abstract, I don't see any result that confirm the affirmation found in the title of  
34 the work. Given the low level of chlorophyll found in GCs, no one is expecting high quantities of ATP  
35 and NADPH to be produced in this cell type.

36 > We agree with the reviewer's comment. We revised the manuscript title to "Arabidopsis guard cell  
37 chloroplasts import cytosolic ATP for starch turnover and stomatal opening" and revised the abstract and  
38 the overall text accordingly.

39

40 Introduction: The introduction section has several erroneous concepts and misleading sentences.

41 Furthermore, it didn't bring the hypothesis, aims and why this work is timely. The introduction is thus  
42 vague and contains out of date concepts. See below in detail.

43 > We appreciate the reviewer's comment. We carefully revised the introduction to include the reviewer's  
44 suggestions and to put the work into its wider up-to-date context, including a clear statement of its  
45 rationale.

46  
47 Lines 19-20: “It remains controversial whether GCCs carry out photosynthesis.” Not sure this assumption  
48 is correct. There are plenty of works showing that GCCs do photosynthesize. This idea is supported by  
49 the identification of rubisco in guard cell protoplasts by proteomics, by fluxomics studies and  
50 physiological measurements. The controversial idea is maybe based in the work from Outlaw (Outlaw et  
51 al., 1979).

52 > The reviewer is correct. There is literature supporting the occurrence of GC photosynthesis and our data  
53 ultimately point towards the idea that at least in part GCCs carry photosynthesis, although at levels that  
54 may not be enough to fully power chloroplast metabolism (both in terms of ATP, NADPH generation and  
55 provision of carbon skeletons). In the revised version of the manuscript, this sentence is therefore  
56 removed to avoid confusion. And we now discuss in great details the contribution of GC photosynthesis  
57 to starch metabolism and in general to stomatal movements.

58  
59 Lines 33-34: “becomes turgid through the influx of potassium (K<sup>+</sup>), chloride (Cl<sup>-</sup>) and nitrate (NO<sub>3</sub><sup>-</sup>)  
60 ions, malate (Mal<sup>2-</sup>) and sugars” Is there any evidence showing that the influx of sugars makes GCs  
61 turgid? Perhaps the authors are basing in the role of sugars as osmolyte proposed by Zeiger and  
62 collaborators (Talbot & Zeiger, 1996), but this is solely based in correlation analysis. Alternatively, the  
63 authors are based in the results from Flütsch et al (Flütsch et al., 2020), in which reduced sugar transport  
64 reduced gs in Arabidopsis. None of these works have showed that sugars change the turgescence of GCs.  
65 Additionally, there are several works showing that exogenous sugar application leads to stomatal closure,  
66 meaning that sugars (and malate) can possibly decrease the turgescence of GCs.

67 > The reviewer makes here an excellent point. None of the current literature directly demonstrates that  
68 sugars produced by guard cells or imported from the mesophyll act directly as osmolytes to change guard  
69 cell turgor. The sentence has been therefore rephrased by using the wording “inorganic” and “organic”  
70 ions (line 35). We additionally point out in the revised introduction at line 44 that “the precise function of  
71 sugars within the guard cells is not fully understood”.

72  
73 Lines 43-44: “stomatal opening is energetically costly, consuming substantial amounts of cytosolic ATP  
74 6” The authors cite a review here. It would be better to cite the original work that support such  
75 information.

76 > Thank you. We have cited original research papers describing the work supporting this statement.

- 77 1. Ref. 14: Tominaga, et al. “Guard-cell chloroplasts provide ATP required for H<sup>+</sup> pumping in the  
78 plasma membrane and stomatal opening” *Plant & Cell Physiology* (2001), 42:795-802.
- 79 2. Ref. 15. Wang, et al. “Lacking chloroplasts in guard cells of crumpled leaf attenuates stomatal  
80 opening: both guard cell chloroplasts and mesophyll contribute to guard cell ATP levels” *Plant,  
81 Cell and Environment* (2014), 37:2201-2210.

82  
83 Results:

84 Figure 1: I suggest comparing MCs and GCs in each time point.

85 > As the ATP and NADPH concentrations are affected by their production/consumption and the size of  
86 the subcellular compartments, a direct comparison between MC and GC is not advisable. To address the  
87 reviewer’s suggestion, we have performed an additional experiment to compare the real-time dynamic  
88 changes of ATP and NADPH in the same subcellular compartment (the chloroplast stroma) of different  
89 cell types (i.e., root, guard cells, mesophyll cells) upon various light treatments. We have added these data  
90 in the revised version as Fig. 2.

91  
92 If GCCs chloroplast function is not related to photosynthesis, why the NADPH level is higher at EoN and  
93 3 min after illumination in GCs than MCs?

94 > The reviewer poses an excellent question. It is known that the relative level of stromal NADPH is  
95 affected by its production and consumption. The NADPH synthesis pathways include the oxidative  
96 pentose phosphate pathway (OPPP) and the light reactions of photosynthesis. The NADPH consumption  
97 pathways include nitrite reduction and the Calvin Benson Cycle (CBB) pathway. To address the  
98 contribution of the OPPP pathway to NADPH synthesis in GCs, we used 6-aminonicotinamide (6-AN), a  
99 phosphogluconate dehydrogenase inhibitor, to block the OPPP. Our new data (Fig. 3c-d) showed that 6-  
100 AN treatment can reduce NADPH levels in both GCs and MCs, suggesting the high NADPH level at the  
101 EoN is due to the OPPP activity which normally occurs in plastid stroma in the dark. Given the GCs have  
102 very limited photosynthetic activity, we suggest that the higher levels of NADPH at the EoN in GCs  
103 compared to MCs are likely a direct result of the OPPP activity, which may represent the main source of  
104 NADPH for guard cells.

105 We have added a dedicated paragraph in the results section to discuss this important set of data. The  
106 reviewer will find this starting at line 105 with the title “GCCs have higher levels of NADPH in the dark  
107 than MCCs”.

108  
109 From EoN to 2 h, there is a decrease in both NADPH and ATP, suggesting a consumption of these  
110 components. Indeed, this is a critical period for stomatal opening. However, from 2h to 8 h, there is an  
111 increase in stromal ATP, this isn't an indication of photosynthetic activity?

112 > The levels of stromal ATP and NADPH at any given time are the balance of various production and  
113 consumption pathways. Our data showed that GC but not mature mesophyll cells express NTTs (Fig. 4a,  
114 Fig. 4b and Supplementary Fig. 4a-b) and therefore ATP can enter GCCs but not mature mesophyll  
115 chloroplasts (Fig. 4c-d). Since photosynthetic activity of GC chloroplast is low, as supported by the  
116 insignificant changes of stromal pH upon illumination (Fig. 1f), it is likely that the major source of  
117 stromal ATP in GCCs is the entry of cytosolic ATP, which were similar between EoN and 8h of light  
118 (Fig. 5a). Assuming the rate of ATP import into guard cell chloroplasts is constant, the lower stromal  
119 ATP at T = 2 could be due to its higher consumption, for example, by starch synthesis. Our data showed  
120 that GCCs and mesophyll chloroplasts have different sources of ATP. While mesophyll chloroplasts  
121 mainly rely on photosynthesis, GCCs mainly rely on the import of cytosolic ATP.

122  
123 Lines 86-87: “Given that the number of chloroplasts and the ratio of chloroplasts to mitochondria are  
124 much lower in GCs than in mesophyll cells 1,23” The reference 1 is a review. Please cite the original  
125 work that confirm it. Perhaps Willmer & Fricker has this information (Willmer & Fricker, 1996).

126 > Thank you. We have cited the original work (Ref. 23) (Allaway and Setterfield, 1972).

127  
128 Lines 91-94: “By contrast, inhibitors of complex I (rotenone) and complex II (thenoyltrifluoroacetone,  
129 TTFA) of the mitochondrial transport chain partially decreased cytosolic ATP levels in mesophyll cells  
130 but had no significant effect on ATP levels in GCs (Supplementary Fig. 6a, b).” The trend is very similar  
131 among MCs and GCs. I think the best test here should be Dunnett, not Tukey, given that there is a clear  
132 control in the experiment (untreated cells).

133 > Thank you. We tried to use the one-way ANOVA with Dunnett's test and generated a new figure.

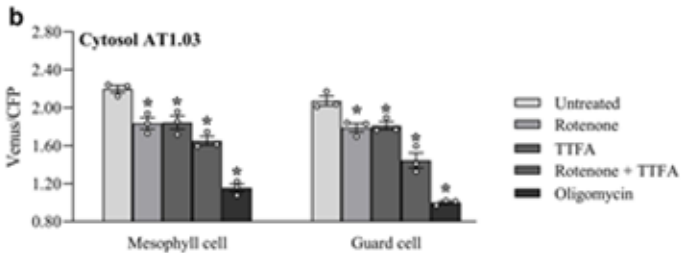

134

135 However, after adding a combinatory treatment of both rotenone and TTFA to Fig. 3e,f, the trends  
 136 became similar among MCs and GCs when one-way ANOVA and Tukey's HSD test ( $P < 0.05$ ) were  
 137 used. Hence, we updated the manuscript with the figure below and revised the text accordingly.

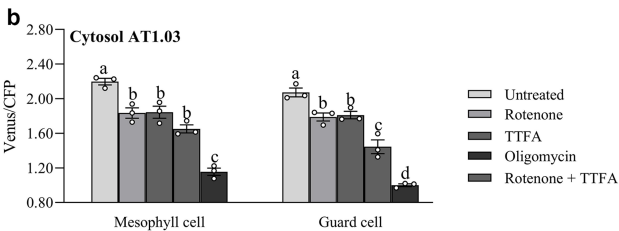

138

139

140 95: "These data suggest that mitochondria are the primary source of ATP for GCs" This is an outstanding  
 141 result that solve a long debate. The authors should explore more this data in the discussion  
 142 > Thank you. To strengthen our conclusions, we performed an additional experiment in which the  
 143 treatment of rotenone + TTFA were combined (Fig. 3e-f). These new results clearly showed that  
 144 mitochondria are indeed the primary source of cytosolic ATP for GCs. We have revised the discussion to  
 145 better highlight this conclusion, including discussion of the currently available literature.  
 146

147 Lines 103-104: "Given that plants expressing the TKTP-iNAP4 sensor in GCCs did not produce  
 148 detectable amounts of NADPH in response to light" Sorry I'm lost here. This sentence is not supported by  
 149 the Fig 1d. Did I miss something? Perhaps the authors want to state that not noticeable increases in  
 150 NADPH was observed.

151 > We apologise with the reviewer if the wording created some confusion. At lines 110-112, we amended  
 152 the sentence to "The levels of NADPH at the EoN in GCs were even higher than those observed in MCs,  
 153 although no noticeable increases in stromal NADPH were observed in GCCs upon illumination (Fig. 1d  
 154 and Fig. 2d),".

155

156 Lines 103-104: "These results further suggest that chloroplasts in both cell types contain substantial  
 157 amounts of NADPH in the dark." The amount of NADPH is much higher in guard cells. This should be  
 158 discussed

159 > We thank you both reviewers for highlighting this interesting difference. We have revised the  
 160 manuscript, adding a dedicated paragraph in the result section to discuss these data in more detail (Lines  
 161 105-123).

162 Fig 2e. I'm wondering why the authors didn't make kinetics of this analysis, such as in their previous  
 163 work in PNAS

164 > We thank you the reviewer for this suggestion. Accordingly, we performed an additional experiment to

165 measure the kinetics of ATP and NADPH production. The results are presented in the revised manuscript  
166 in Fig. 2a-f. Our kinetic analysis showed that illumination stimulated ATP and NADPH production and  
167 alkalization in mesophyll chloroplasts but not in GCCs and root.

168  
169 Lines 145-146: “DCMU inhibited starch accumulation in both WT and *stp1stp4* isolated GCs, indicating  
170 that GC photosynthesis at least partly contributed to starch synthesis (Fig. 3c).” The take home message  
171 here is clear: photosynthesis is crucial for starch synthesis, which is a paradox with the conclusions and  
172 the title of the work.

173 > We agree that GC photosynthesis at least partly contributed to starch synthesis. Following the  
174 reviewer’s suggestion, we revised the manuscript title to “*Arabidopsis* guard cell chloroplasts import  
175 cytosolic ATP for starch turnover and stomatal opening” and revised the text accordingly, with a new  
176 paragraph discussing the DCMU data in greater details (Lines 239-247).

177  
178 Fig. 3d. The protoplast of GCs is much lower than MCs. Thus, the expected is that the level of proteins  
179 will be lower than MCs. This data should be normalized to make this comparison a fair one. Perhaps the  
180 size of protoplasts or the level of chlorophyll can be used for the normalization.

181 > The reviewer makes a valuable comment. To take this into consideration, please see in Fig. 5i that the  
182 protein concentrations of GCs and MCs were quantified and equalized before loading. The Western Blot  
183 data showed that the amounts of actin, a housekeeping protein, were indeed comparable between GCs and  
184 MCs, while other key proteins showed different amounts between the two cell types. Since GCCs and  
185 mesophyll chloroplasts greatly differ in size (Supplementary Fig. 5b), protoplast size or the level of  
186 chlorophyll may vary a lot and it is better not to use them for normalization of protein amounts.

187  
188 Figures 3 g and h were not cited in the results section.

189 > We apologise for this mistake. In the revised manuscript, we discuss Fig. 3g and 3h (now  
190 Supplementary Fig. 3c-d) in line 150.

191  
192 Discussion:

193 Lines 169-172: “The data presented here provide novel insights into how starch metabolism in GCs  
194 integrates and how GCCs obtain energy and carbon for starch metabolism when they do not generate  
195 sufficient ATP or NADPH during illumination nor fix substantial amount of CO<sub>2</sub> through the CBB  
196 pathway.” The authors haven’t measured CO<sub>2</sub> fixation. In general, the authors exacerbated and/or  
197 extrapolated their conclusions to unmeasured things.

198 > The reviewer is right in pointing out that we have not directly measured CO<sub>2</sub> fixation in GCs. However,  
199 other labs have previously used O<sub>2</sub> evolution in guard cell- and mesophyll protoplasts (Shimazaki and  
200 Okayama, 1990), or incorporation of carbon isotopes into metabolic intermediates (Daloso et al., 2015;  
201 Shimazaki and Okayama, 1990) as a proxy for photosynthetic activity. In all cases, these authors have  
202 demonstrated a modest but detectable photosynthetic activity in guard cells. Our Western Blot results,  
203 showing that GCs express CBB enzymes at a much lower levels compared to mesophyll cells, similarly  
204 suggest that only a modest CO<sub>2</sub> fixation activity occurs in GCCs compared to the mesophyll cell  
205 chloroplasts. This conclusion is further supported by the DCMU data presented in Fig. 5g-h. Thus, the  
206 above-mentioned sentence is based on both data from the literature and our own experiments.

207  
208 Lines 176-178: “The ATP-dependent activation of the phototropin-H<sup>+</sup>-ATPase pathway triggers BL-



209 dependent degradation of GC starch at the onset of illumination, which yields glucose, promoting rapid  
210 stomatal opening” I have two major concerns regarding this conclusion involving glucose. The major  
211 products exported from leaf plastidial starch degradation are maltose and glucose (Glc). It is unclear  
212 however which one (Glc or maltose) is the major product from starch breakdown in GCs. Evidence  
213 suggests that maltose and maltotriose are the main products of GC starch degradation (Talbot & Zeiger,  
214 1993). Given that Flütsch et al. did not measure maltose, we cannot rule out the hypothesis that maltose is  
215 the main product of starch degradation released from GCCs. Furthermore, assuming that Glc is the major  
216 metabolite derived from starch degradation, one would expect Glc levels to increase after starch  
217 degradation, including in WT. However, in their experiment, Glc levels were unaltered from dark (D)-to-  
218 BL transition in WT plants. Given that a substantial part of the Glc pool is probably rapidly degraded to  
219 activate glycolysis under this condition, only a time series data would detect such increase in Glc content.  
220 Thus, the Glc data from single point measurements coupled to the lack of maltose quantification do not  
221 fully support the conclusion that Glc is the major metabolite derived from starch degradation.

222 In summary, the results obtained by Flütsch et al and the current work show compelling evidence for the  
223 role of guard cell starch metabolism during light stomatal responses. However, their attempts to answer  
224 (i) what is the major product of starch degradation and (ii) what is the fate of the C released from starch  
225 breakdown need to be interpreted with caution.

226 > We thank you the reviewer for this thoughtful comment. We fully agree that single time point  
227 measurements do not reveal metabolic dynamics and their kinetics. In guard cells, measure of metabolic  
228 kinetics is a challenging task and would only be possible by using isotope labelling. As such, we cannot  
229 exclude that in Flütsch et al, (Flütsch et al., 2020), a transient peak in malate and/or glucose accumulation  
230 was missed due to our experimental setup. Simultaneous synthesis/use of malate in guard cells and rapid  
231 consumption of glucose through glycolysis makes it difficult to detect fine changes in the amount of these  
232 metabolites. However, the fact that there were no differences in malate content between the wild type and  
233 *amy3 bam1* mutant led us to conclude that malate is not the major starch-derived metabolite in  
234 *Arabidopsis* guard cells during BL-induced stomatal opening. As for maltose: this is usually measured by  
235 HPLC, as there is no sensitive assay that can reliably measure maltose enzymatically. In any case, even if  
236 maltose was exported from the guard cell chloroplast, this would be rapidly converted into glucose  
237 through a series of cytosolic reactions involving for example enzymes such as the disproportionating  
238 enzyme DPE2 and the alpha-glucan phosphorylase PHS2. The questions (i) what is the major product of  
239 starch degradation and (ii) what is the fate of the C released from starch breakdown are still open and  
240 research in our lab is currently attempting to provide an answer.

241  
242 Lines 178-179: “The ability of GCCs to produce ATP and NADPH is marginal (Fig. 1b, d)” I don’t see  
243 tremendous differences between MCs and GCs in both ATP and NADPH levels. The NADPH seems  
244 even higher in GCs than MCs. The authors should rephrase this sentence or provide statistical comparison  
245 between the two cell types.

246 > We apologise with the reviewer if this sentence generated confusion. Here, we mean that the increase in  
247 FRET ratio upon illumination in GCCs is not significant, suggesting that the ability of GCCs to produce  
248 ATP and NADPH in response to light is marginal. We have rephrased the sentence to make this clear.

249  
250 Lines 188-189: “Hence, the main function of GCCs is not photosynthesis or CO<sub>2</sub> fixation; rather, it is to serve as a  
251 reservoir of starch, which is essential for regulating stomatal opening” What are the evidence for this conclusion? Is  
252 not clear to me. I think the work provide evidence for the opposite conclusion: that photosynthesis is crucial for  
253 starch synthesis in illuminated GCs. This idea is based in the fact that DCMU treatment abolished starch synthesis in  
254 GCs.

255 > We agree with the reviewer’s comment. We remove this sentence and in the revised manuscript we

256 have dedicated sections in both results and discussion to highlight that GC photosynthesis is important for  
257 starch synthesis.

258

259 Another major concern: GCs have several characteristics of sink cells and C4/CAM cells. Thus, in order  
260 to fully understand the function of GCCs, the authors should make a wider comparison, using source and  
261 sink MCs of the same plant and possibly MCs from other species.

262 > The reviewer correctly points out that GCs have several features of sink cells. The suggestion to  
263 compare FRET changes in source and sink MCs within the same rosette is excellent. Indeed, a similar  
264 experiment was done previously in Arabidopsis using  $^{14}\text{CO}_2$  pulse-chase labelling. It was shown that a  
265 small developing leaf which acts as sink MCs (i.e. leaf no. 13 of a 3-week-old plant) is still able to  
266 photosynthesize when fed with  $^{14}\text{CO}_2$ . However, it does not export carbon to the neighbouring cells nor to  
267 other sink tissues (Kölling et al., 2013; Kölling et al., 2015). Based on this evidence, we assume that GCs  
268 will behave similarly in source and sink MCs.

269 Arguably, a better comparison would be between GCs and other sink tissues, such as root cells. Thus,  
270 prompted by the reviewer suggestion to expand our analysis, we have performed an additional  
271 experiment, in which we measured real-time dynamic changes of ATP and NADPH in the same  
272 subcellular compartment (the plastid stroma) of different cell types (i.e. root, guard cells, mesophyll cells)  
273 upon various light treatments (Fig. 2). The results showed that GCs behave very similarly to root cells,  
274 confirming their characteristics of sink tissues. However, GCs showed overall higher amounts of ATP  
275 and NADPH, and a more alkaline stroma compared to roots. It seems likely that even if GCs do not  
276 produce significant amounts of ATP and NADPH through photosynthesis, their metabolism is adapted to  
277 supply the demand of energy for stomatal movements.

278

279

280

281

282

283

284 Reviewer #2 (Remarks to the Author):

285 The MS by Lim et al explores the function of guard cell chloroplasts in Arabidopsis. Using a range of  
286 fluorescence protein sensors the authors monitored ATP and NADPH production in guard cells and  
287 compared the findings to mesophyll cells and concluded that photosynthetic electron transport is not  
288 responsible for the production of ATP required for stomatal opening to blue light. Using Nucleotide  
289 transporter mutants, they suggest that ATP is imported into guard cell chloroplasts and this is required for  
290 starch biosynthesis. From these findings the authors conclude that guard cell chloroplasts serve as a starch  
291 reservoir rather than carrying out photosynthesis.

292 This is an interesting MS as the role of guard chloroplasts has been debated for many years (although  
293 work by others in this area has not been included in the MS – see comment below). The authors have  
294 carried out a substantial amount of work and used a range of different approaches to explore guard cell  
295 chloroplast metabolism. Below I have outlined some comments to help improve the MS.

296

297 My main concern with the MS regards the use of only fluorescence probes to “quantify” the amounts of  
298 substances. These ratiometric probes can be extremely useful for cellular localization and provide some  
299 indicative measure of substances - however they are also subject to various limitations, with different re-  
300 absorption properties depending on the wavelength, pH and redox influences as well as detection.

301 Furthermore, confocal microscopy can easily damage the material and probes due to photo bleaching

302 episodes. Putting these caveats aside I am not entirely convinced by the differences between guard and  
303 mesophyll cell signals suggested by the authors. It is extremely difficult to see the differences between the  
304 mesophyll and the guard cells in Suppl Fig.1. This is supported by the fact that the absolute levels  
305 outlined in Fig. 1 and suppl Fig.2 are in very similar ranges and that only very small differences between  
306 the two cell types were observed when illuminated.

307 This could be because the probes/sensors are saturated –did the authors test for this? These data are not  
308 convincing and it would be nice to see these supported by “actual” measurements rather than proxy  
309 measures.

310 > The reviewer makes a very good point. It would be in theory great to confirm our FRET analyses with  
311 biochemical measurements. However, absolute metabolite quantification in guard cells is still technically  
312 very challenging, especially for molecules such as NADPH and ATP, which have a very short half-life.  
313 Previously, ATP in guard cells has been measured by using a bioluminescence assay kit in epidermal  
314 peels of Arabidopsis luciferase transgenics plants and expressed as relative luminescence intensity/cell  
315 (Wang et al., 2014). However, no subcellular information could be determined by this method.

316 We decided to use the sensors. Despite the sensors are not able to provide quantitative information about  
317 absolute metabolite amounts, they are very useful in detecting relative changes *in planta* (i.e. dark vs  
318 illuminated), which was the aim of our study. Furthermore, the sensors expressed in different subcellular  
319 compartments give the advantage to track organelle-specific changes in ATP amounts. Overall, we  
320 believe that considering current technical limitations, FRET sensors are a great tool to study ATP and  
321 NADPH metabolism in guard cells.

322 The *in planta* performance of these sensors have been carefully examined in our previous studies (Lim et  
323 al., 2020; Voon et al., 2018). In any case, to address the reviewer’s comment and further show the  
324 responsiveness of these sensors *in planta*, we carried out an additional experiment in which we have  
325 examined their kinetic performance upon illumination. As shown in Fig. 2a-b, the stromal ATP  
326 concentration was not saturated in the dark: before illumination, the ratios were comparable in both types  
327 of chloroplasts, while illumination only increased the ATP concentration in mesophyll chloroplasts but  
328 not GCCs. Similar observation could be seen for the pH sensor (Fig. 2e-f). NADPH was also not  
329 saturated (Fig. 2c-d). In GCCs, the stromal NADPH concentrations were lower at 2h and 8 h into the day  
330 compared to the EoN (Fig. 1d). However, no detectable increase in stromal NADPH were observed upon  
331 illumination at these two time points. In the revised manuscript, we now clearly state that our sensors  
332 were operating within their respective optimal range of detection.

333

334 How do the authors explain such high levels of NADPH in the dark?

335 The authors should explain exactly how the dyes work and include the known pitfalls with these  
336 radiometric dyes.

337 > Please, see our answer to reviewer 1 starting at line 92 of this file. In M&M, we cite the original papers  
338 describing each sensor, where the reader will find precise information about how each sensor works and  
339 their advantages/disadvantages.

340

341

342 Why was 3-minute illumination chosen for these measurements?

343 > Photosynthesis responses to light are known to be quick. For example, upon changes in photosynthetic  
344 photon flux density during sun/shade flecks caused by passing clouds or overlapping leaves in a canopy,  
345 photosynthesis adapts quickly by reaching a new steady state within several tens of seconds to minutes  
346 (Barradas and Jones, 1996). Thus, 3 min should be largely sufficient to observe changes in photosynthesis  
347 activity both in guard cell and mesophyll cells. The same experimental conditions were indeed used in our



348 previous studies (Lim *et al.*, 2020; Voon *et al.*, 2018).

349

350

351 What does high and low represent in the false colour images? This information should be included in the  
352 colour scale bar and are the scale bars the same for all images?

353 > We amended the colour bars. We now present them with a more precise description (eg, low/ high  
354 MgATP<sup>2-</sup>, low/high NADPH level, and acid/ alkaline) and included the information of each scale bar in  
355 the figure legend.

356

357 The authors present data illustrating that GC contain much lower amounts of CBB cycle enzymes than  
358 mesophyll. This is not new and has been demonstrated and discussed previously. GCs are 20x smaller  
359 than mesophyll was this taken into account?

360 > To the best of our knowledge, previous reports focused on other plant species. No western blot data on  
361 CBB enzymes are available for Arabidopsis guard cells. While we recognize that our data confirm  
362 findings from other species (which in a way is really nice!), we believe that they play a key role in our  
363 manuscript as they match with the results of the sensor experiments and DCMU treatment, and so provide  
364 further support to our conclusions. Given the differ in size between GCs and MCs, we normalized the  
365 protein loading to the housekeeping protein actin and compared a number of cytosolic enzymes and  
366 stromal enzymes.

367

368 Can the authors provide an explanation for the presence of Calvin cycle enzymes in the guard cells if no  
369 Calvin cycle activity is taking place?

370 > We did not say there was no CBB activity in GC.

371

372 Fig. 3d – the authors show different amounts of starch produced in the *ntt* mutants compared with wild  
373 type – although the *ntt1* and *ntt2* mutants did not accumulate starch the stomata were still functional with  
374 only small differences in aperture observed, and stomata remained open for 8 h. What spectrum of light  
375 was used in these experiments?

376 > The stomatal aperture measurements were performed under white light at 150  $\mu$ E. However, as the  
377 reviewer will see in our revised manuscript, the stomatal aperture results have been replaced with gas  
378 exchange experiments using LI-COR 6400 (Fig. 5d-e, Supplementary Fig. 7). Measuring stomatal  
379 aperture under the microscope is not a very precise method. Instead, the use of Licor allows fine stomatal  
380 conductance ( $g_s$ ) measurements, providing important information about the kinetics of stomatal  
381 movements (both rapidity of opening and closing, and amplitude of opening response). The new  $g_s$  data  
382 revealed that *ntt1* mutant has dramatic reductions in  $g_s$  responses upon transition from dark to light and  
383 light to dark compared to wild type, while *ntt2* mutant has a milder phenotype. The  $g_s$  phenotype of *ntt*  
384 mutants reflects their relative expression levels in guard cells, as reported in Fig. 4a (*NTT1* is more highly  
385 expressed in guard cells compared to *NTT2*). The guard cell starch phenotype is also interesting, as you  
386 see that *ntt2* mutant shows some starch accumulation after 8 h of light, while *ntt1* mutant remains  
387 essentially devoid of starch throughout the day.

388

389 The introduction does not fully cover the literature on guard cells photosynthesis – there are several  
390 reviews in this area that have not been included. The amount of information in the blue light pathway  
391 could be reduced to a few sentences and focus only on the fact that energy (ATP) is a key component of  
392 this pathway. Additionally the authors need to include more context to highlight why the information  
393 from this study is important.

394 > The introduction has been substantially revised to take the reviewer's comments and suggestions into  
395 consideration. Thank you.

396

397 The mutants need to be introduced fully to the reader. Difference between NTT1 and NTT2 etc.

398 > We added detailed information about NTT1 and NTT2 at lines 159-165 of the revised manuscript

399

400 Can the authors provide further explanations for the effect of complex I and II inhibitors relative to  
401 oligomycin on the effects of mitochondrial ATP production?

402 > Rotenone and TTFA only inhibits complex I and complex II, respectively. Both complexes partially  
403 contribute reducing equivalents to the mETC. Hence, unlike oligomycin, which completely inhibits  
404 mitochondrial ATP production, the use of either rotenone or TTFA could only partially reduce the ATP  
405 concentration. To fully address the reviewer comment, we performed additional FRET experiment using  
406 both rotenone and TTFA inhibitors, as shown in Fig. 3e-f. The combined use of rotenone and TTFA has  
407 greater impact on ATP production compared to the single inhibitor treatments, particularly in guard cells.

408

409 The authors demonstrate that guard cell electron transport does contribute to some production of starch  
410 and this should be included and discussed further in the discussion section.

411 > The discussion has been extensively revised to take this and other reviewer's comments into  
412 consideration.

413

414 All of the figure legends need to state which light spectra were used – blue, red or white light.

415 > Light spectra information is now inserted in each figure legend.

416

417 The discussion is a little repetitive of the results in places. It would be good to see further discussion on  
418 the context. Also the authors focus on BL stomatal responses – however what about the red light driven  
419 pathway – could guard cell metabolism be different under different conditions? It should be  
420 acknowledged that this work focuses specifically on the BL pathway.

421 > The discussion has been extensively revised to take this and other reviewer's comments into  
422 consideration.

423

424 Letter is missing from Fig. 3d.

425 > This has been amended.

426

427 The symbols in the graphs of Fig 3 are extremely difficult to distinguish between controls and treatments.  
428 I would recommend using filled and open symbols rather than various greys.

429 > We replotted the graphs of Fig. 3 (now Fig. 5h), using different colours instead of shades of grey.  
430 Thank you for the suggestion.

431

432 Suppl Fig. 7 – the untreated GC at 8 h in the dark appear at a similar YPF level as guard cells at time zero  
433 EoN guard cells – can the authors discuss these finding in greater detail?

434 > The sensor ratio of the untreated GC at 8h was lower than the untreated GC at EoN (now  
435 Supplementary Fig. 3). This likely indicates that after prolonged illumination the GC cytosol became  
436 more acidic. However, this is our interpretation and we feel we cannot provide a simple explanation for  
437 this observation as cytosolic pH is subject to a variety of controlling factors.

438

439 Line 44 – substantial amounts – what is substantial?

440 > We removed the word substantial and instead use “high”. It is difficult to estimate exactly how much

441 ATP is needed, as this is also species-specific. As we mentioned above, absolute quantification of  
442 metabolites such as ATP or NADPH is very difficult, particularly in the tiny guard cells.

443

444 **References:**

- 445 Allaway, W.G., and Setterfield, G. (1972). Ultrastructural observations on guard cells of *Vicia Faba* and  
446 *Allium Porrum*. *Can J Botany* 50, 1405-1413.
- 447 Barradas, V.L., and Jones, H.G. (1996). Responses of CO<sub>2</sub> assimilation to changes in irradiance:  
448 laboratory and field data and a model for beans (*Phaseolus vulgaris* L.). *Journal of Experimental Botany*  
449 47, 639-645. 10.1093/jxb/47.5.639.
- 450 Daloso, D.M., Antunes, W.C., Pinheiro, D.P., Waquim, J.P., Araujo, W.L., Loureiro, M.E., Fernie, A.R., and  
451 Williams, T.C. (2015). Tobacco guard cells fix CO<sub>2</sub> by both Rubisco and PEPcase while sucrose acts as a  
452 substrate during light-induced stomatal opening. *Plant, cell & environment* 38, 2353-2371.  
453 10.1111/pce.12555.
- 454 Flütsch, S., Wang, Y., Takemiya, A., Violet-Chabrand, S.R., Klejchova, M., Nigro, A., Hills, A., Lawson, T.,  
455 Blatt, M.R., and Santelia, D. (2020). Guard cell starch degradation yields glucose for rapid stomatal  
456 opening in *Arabidopsis*. *Plant Cell* 32, 2325-2344. 10.1105/tpc.18.00802.
- 457 Kölling, K., Müller, A., Flütsch, P., and Zeeman, S.C. (2013). A device for single leaf labelling with CO<sub>2</sub>  
458 isotopes to study carbon allocation and partitioning in *Arabidopsis thaliana*. *Plant Methods* 9, 45.  
459 10.1186/1746-4811-9-45.
- 460 Kölling, K., Thalmann, M., Müller, A., Jenny, C., and Zeeman, S.C. (2015). Carbon partitioning in  
461 *Arabidopsis thaliana* is a dynamic process controlled by the plants metabolic status and its circadian  
462 clock. *Plant, cell & environment* 38, 1965-1979. <https://doi.org/10.1111/pce.12512>.
- 463 Lim, S.L., Voon, C.P., Guan, X., Yang, Y., Gardestrom, P., and Lim, B.L. (2020). *In planta* study of  
464 photosynthesis and photorespiration using NADPH and NADH/NAD<sup>+</sup> fluorescent protein sensors. *Nat*  
465 *Commun* 11 (3238), 3238.
- 466 Shimazaki, K.I., and Okayama, S. (1990). Calvin Benson cycle enzymes in guard-cell protoplasts and their  
467 role in stomatal movement. *Biochem Physiol Pfl* 186, 327-331.
- 468 Voon, C.P., Guan, X., Sun, Y., Sahu, A., Chan, M.N., Gardeström, P., Wagner, S., Fuchs, P., Nietzel, T.,  
469 Versaw, W.K., et al. (2018). ATP compartmentation in plastids and cytosol of *Arabidopsis thaliana*  
470 revealed by fluorescent protein sensing. *Proc Natl Acad Sci U S A* 115, 10778-10787.  
471 10.1073/pnas.1711497115.
- 472 Wang, S.W., Li, Y., Zhang, X.L., Yang, H.Q., Han, X.F., Liu, Z.H., Shang, Z.L., Asano, T., Yoshioka, Y., Zhang,  
473 C.G., and Chen, Y.L. (2014). Lacking chloroplasts in guard cells of crumpled leaf attenuates stomatal  
474 opening: both guard cell chloroplasts and mesophyll contribute to guard cell ATP levels. *Plant Cell and*  
475 *Environment* 37, 2201-2210.

476

<b>REVIEWER COMMENTS</b>

Reviewer #1 (Remarks to the Author):

Lim, Flütsch and collaborators have substantially improved the work and performed additional experiments that provide important information for the regulation of both MCs and GCs metabolisms.

Congrats for this incredible work.

I only have minor comments, highlighted below.

General comment: The results of the Supplementary Fig 7d is very interesting, but not discussed. It seems that the import of ATP to GCCs through NTT1 is also important for dark-induced stomatal closure, not only light-induced stomatal movements. It would be great to have a brief explanation on how the lack of NTT1 (i.e. reduced GCCs ATP level) compromise the stomatal closure. This probably involves starch synthesis, given that both *ntt1* and *ntt2* have lower levels of starch at EoN. This idea is in agreement with the hypothesis raised by Outlaw in which gluconeogenesis and starch synthesis would be activated during stomatal closure.

Minor concern:

Lines 102-103: “We conclude that photosynthetic electron transport in Arabidopsis GCCs is limited”. I think the results of the Fig 1 do not support such conclusion. The higher stromal pH may be highly influenced by the higher levels of chlorophyll found in MCs. The level of ATP and NADPH is equal or even higher in GCs, compared to MCs at the same time points. It seems that the regulation of GC plastidial ATP and NADPH metabolisms is light independent, or not responsive to light exposition.

Minor comments:

Lines 144-145. “that mitochondria are a major source of cytosolic ATP of MCs and, particularly, GCs of mature leaves.” This is a very important result that contribute to solve a debated question in GCs. Furthermore, the results from MCs also contribute to explain previous modelling results from Lee Sweetlove group (Shameer et al., 2019).

Lines 212-214: “There are two possible carbon sources for GC starch synthesis: photoassimilates from GC photosynthesis and sugars imported from the mesophyll” Gluconeogenesis is likely another source of carbons for starch synthesis (Willmer and Dittrich, 1974; Outlaw and Kennedy, 1978; Lima et al., 2021)

Lines 380-381: “Fixation of CO<sub>2</sub> via PEP carboxylation ultimately leads to the formation of Mal<sup>2-</sup>, further highlighting the central role of this metabolite for GCs.” Indeed, this has been demonstrated through a recent positional <sup>13</sup>C-analysis (Lima et al., 2021). The authors also detected <sup>13</sup>C incorporation in glucose, including in the dark, suggesting that PEPc-mediated CO<sub>2</sub> assimilation is important for both sugar and organic acid homeostasis.

Lima VF, Erban A, Daubermann AG, et al. 2021. Establishment of a GC-MS-based <sup>13</sup>C-positional isotopomer approach suitable for investigating metabolic fluxes in plant primary metabolism. *The Plant Journal*.

Outlaw WH, Kennedy J. 1978. Enzymic and substrate basis for the anaplerotic step in guard cells. *Plant physiology* 62, 648–652.

Shameer S, Ratcliffe RG, Sweetlove LJ. 2019. Leaf Energy Balance Requires Mitochondrial Respiration and Export of Chloroplast NADPH in the Light. *Plant Physiology* 180, 1947–1961.

Willmer CM, Dittrich P. 1974. Carbon dioxide fixation by epidermal and mesophyll tissues of *Tulipa* and *Commelina*. *Planta* 117, 123–132.

Reviewer #2 (Remarks to the Author):

The authors have made an excellent job addressing all of the reviewers’ comments and the MS has greatly improved. It is much clearer, the story more convincing and the conclusions drawn stronger.

Regarding the role of mitochondria in guard cell movement, the authors should include the recent paper by Violet-Charband et al., in *New Phytologist* that supports the role of mitochondria for energy release used in blue light induced stomatal opening.

The least convincing aspect of the MS for me remains the use of the probes and images provided in the MS to distinguish differences in ATP, NADPH and pH etc. It remains extremely difficult to see the differences highlighted in the bar charts in the actual images shown. I wonder if this is due to the large-scale bar range used. The majority of images only show the blue and green colour ranges, therefore if

the colour bar was re-scaled to these extremes, the contrast with the image would become more evident.

The authors demonstrate that 6-AN inhibits NADPH production in both *gc* and *mc* in the dark, however there would be no expectation of an alternative source in the dark. Does this not need to be carried out under illumination to explain the impact on stomatal opening?

Line 142 – the authors suggest more severe depletion of cytosolic ATP in the *gc* – however the control levels are already lower than MCs. Is the decrease statically greater between the two cell types?

Line 145 – It is not clear that these measurements were performed on leaves of different ages.

Suppl Fig.3 At 8h the images suggest that the GC are more alkaline after treatment with oligomycin than the controls.

There are several sections in the results where it would be useful for the authors to direct the reader back to the specific data. E.g. the first few sentences in the *ntt1* mutant section (starting line 182).

Can the authors provide an explanation as to why the *ntt2* mutant has a high *gs* despite lower starch, ATP etc. and the other features that provide the explanation for the *ntt1* mutant function.

## REVIEWER COMMENTS

Reviewer #1 (Remarks to the Author):

Lim, Flütsch and collaborators have substantially improved the work and performed additional experiments that provide important information for the regulation of both MCs and GCs metabolisms. Congrats for this incredible work.

I only have minor comments, highlighted below.

General comment: The results of the Supplementary Fig 7d is very interesting, but not discussed. It seems that the import of ATP to GCCs through NTT1 is also important for dark-induced stomatal closure, not only light-induced stomatal movements. It would be great to have a brief explanation on how the lack of NTT1 (i.e. reduced GCCs ATP level) compromise the stomatal closure. This probably involves starch synthesis, given that both *ntt1* and *ntt2* have lower levels of starch at EoN. This idea is in agreement with the hypothesis raised by Outlaw in which gluconeogenesis and starch synthesis would be activated during stomatal closure.

> This is a very good suggestion. Thank you. We have added the discussion about the importance of gluconeogenesis and ATP import to GCCs for starch synthesis and stomatal closure at lines 206-212.

Minor concern:

Lines 102-103: “We conclude that photosynthetic electron transport in Arabidopsis GCCs is limited”. I think the results of the Fig 1 do not support such conclusion. The higher stromal pH may be highly influenced by the higher levels of chlorophyll found in MCs. The level of ATP and NADPH is equal or even higher in GCs, compared to MCs at the same time points. It seems that the regulation of GC plastidial ATP and NADPH metabolisms is light independent, or not responsive to light exposition.  
> Fig. 1 compared the dynamic changes of stromal ATP, NADPH and pH induced by illumination in GCs and MCs. We amended the sentence to “these data suggest that, comparing to MCCs, photosynthetic production of ATP and NADPH in Arabidopsis GCCs is limited.” (lines 99-100).

Minor comments:

Lines 144-145. “that mitochondria are a major source of cytosolic ATP of MCs and, particularly, GCs of mature leaves.” This is a very important result that contribute to solve a debated question in GCs. Furthermore, the results from MCs also contribute to explain previous modelling results from Lee Sweetlove group (Shameer et al., 2019).

> Thank you. We cited the paper (Shameer et al., 2019) in line 141 (Ref. 43).

Lines 212-214: “There are two possible carbon sources for GC starch synthesis: photoassimilates from GC photosynthesis and sugars imported from the mesophyll” Gluconeogenesis is likely another source of carbons for starch synthesis (Willmer and Dittrich, 1974; Outlaw and Kennedy, 1978; Lima et al., 2021)

> Thank you. We have included gluconeogenesis as a possible carbon source (lines 218-221) and cited the corresponding papers.

Lines 380-381: “Fixation of CO<sub>2</sub> via PEP carboxylation ultimately leads to the formation of Mal2-, further highlighting the central role of this metabolite for GCs.” Indeed, this has been demonstrated through a recent positional <sup>13</sup>C-analysis (Lima et al., 2021). The authors also detected <sup>13</sup>C incorporation in glucose, including in the dark, suggesting that PEPc-mediated CO<sub>2</sub> assimilation is important for both sugar and organic acid homeostasis.

> We thank the reviewer for this information. This study (Lima et al., 2021) is cited at lines 221, 383 and 387 (Ref. 52).

Lima VF, Erban A, Daubermann AG, et al. 2021. Establishment of a GC-MS-based <sup>13</sup>C-positional isotopomer approach suitable for investigating metabolic fluxes in plant primary metabolism. *The Plant Journal*.

Outlaw WH, Kennedy J. 1978. Enzymic and substrate basis for the anaplerotic step in guard cells. *Plant physiology* 62, 648–652.

Shameer S, Ratcliffe RG, Sweetlove LJ. 2019. Leaf Energy Balance Requires Mitochondrial Respiration and Export of Chloroplast NADPH in the Light. *Plant Physiology* 180, 1947–1961.

Willmer CM, Dittrich P. 1974. Carbon dioxide fixation by epidermal and mesophyll tissues of *Tulipa* and *Commelina*. *Planta* 117, 123–132.

Reviewer #2 (Remarks to the Author):

The authors have made an excellent job addressing all of the reviewers' comments and the MS has greatly improved. It is much clearer, the story more convincing and the conclusions drawn stronger. Regarding the role of mitochondria in guard cell movement, the authors should include the recent paper by Violet-Charband et al., in *New Phytologist* that supports the role of mitochondria for energy release used in blue light induced stomatal opening.

> Thank you. We have cited the work in line 287 (Ref. 54).

The least convincing aspect of the MS for me remains the use of the probes and images provided in the MS to distinguish differences in ATP, NADPH and pH etc. It remains extremely difficult to see the differences highlighted in the bar charts in the actual images shown. I wonder if this is due to the large-scale bar range used. The majority of images only show the blue and green colour ranges, therefore if the colour bar was re-scaled to these extremes, the contrast with the image would become more evident.

> We thank reviewer for pointing out his doubt. Although these genetically encoded fluorescent proteins are relatively new in plant field, all sensors used in this manuscript have been fully characterized in *Arabidopsis* and have been used by several research groups to answer scientific questions (e.g iNAPs (Lim et al., 2020; Haber et al., 2021), cpYFP (Behera et al., 2018; Voon et al., 2018; Lim et al., 2020), AT1.03 (De Col et al., 2017; Voon et al., 2018)).

To avoid errors during image processing, the parameters for processing the ratio images given in this manuscript (for example, Supplementary Figure 1, Supplementary Figure 3) are the same as the settings of our previous publications. We included a note to the figure legends to inform the reader that some of the images are raw ratio but not normalized ratios. As a result, the ratios are not explicitly implied by the displayed images.

All the raw image data are now available to the public through the repository BioStudies (line 570). <https://www.ebi.ac.uk/biostudies/>

The accession number is TMP\_1638269162656, which will be online on 1.1.2022.

The authors demonstrate that 6-AN inhibits NADPH production in both gc and mc in the dark, however there would be no expectation of an alternative source in the dark. Does this not need to be carried out under illumination to explain the impact on stomatal opening?

> We thank the reviewer for this important comment. We actually used 6-aminonicotinamide (6-AN) to illustrate that OPPP is indeed the major source of NADPH in MC and GC in the dark. It is well-known that the OPPP pathway is inactive in the light, as the first enzyme of OPPP, glucose-6-



phosphate dehydrogenase (G6PDH), which generates NADPH, is inactivated by light-activated thioredoxins (Née et al., 2009).

Line 142 – the authors suggest more severe depletion of cytosolic ATP in the gc – however the control levels are already lower than MCs. Is the decrease statically greater between the two cell types?

> We apologise if the wording created confusion. As we did not directly compare the two cell types, we removed the sentence “but the effect was more severe in GCs, which were almost depleted of cytosolic ATP” (Line 139).

Line 145 – It is not clear that these measurements were performed on leaves of different ages. Suppl Fig.3 At 8h the images suggest that the GC are more alkaline after treatment with oligomycin than the controls.

>The measurements were carried out using the 4<sup>th</sup> leaves of 20- to 22-day-old plants. It is now stated in the figure legend of Supplementary Fig. 3.

Yes, at 8h the GC cytosol is more alkaline after oligomycin treatment. One possible explanation is that since oligomycin inhibits ATP production from mitochondria, the GC at 8h needs to increase ATP production via glycolysis (of its accumulated starch or imported sugars). However, since pyruvate is not consumed by mitochondria anymore, accumulated pyruvate has to be converted into acetaldehyde and then to ethanol to regenerate NAD<sup>+</sup>. These enzymatic processes consume protons and will alkalize the cytosol.

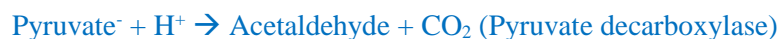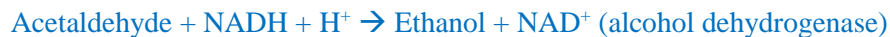

As cytosolic pH can be affected by many biological processes and it is not the main topic of this manuscript, we do not want to over-interpret this observation. Nonetheless, our data showed that alkalization of cytosolic pH induced by illumination is abolished in both MCs and GCs after oligomycin treatment.

There are several sections in the results where it would be useful for the authors to direct the reader back to the specific data. E.g. the first few sentences in the *ntt1* mutant section (starting line 182).

> We apologise for the inconvenience. Figure numbers were added to the sentences in lines 163, 180, 198, 203 and 204.

Can the authors provide an explanation as to why the *ntt2* mutant has a high  $g_s$  (Fig. 5d) despite lower starch, ATP etc. and the other features that provide the explanation for the *ntt1* mutant function.

> Based on qPCR data, it is clear that NTT1 is the major isoform of NTTs in GCs. This is reflected in the phenotypes of the corresponding *ntt* mutants. Despite the trend of  $g_s$  in *ntt2* is higher than that of WT, there are no statistically significant differences between the mutant and the WT, as highlighted in the figure itself. While it is true that *ntt2* has lower starch content in GCs compared to WT, we still see a certain degree of starch turnover, and most importantly a statically significant decrease in GC starch content upon illumination, which may explain the  $g_s$  trend. It is possible that *NTT1* is upregulated in *ntt2* mutant background to compensate for its absence, although we have not tested it directly. We briefly discuss this point in the corresponding result section.

**Behera, S., Xu, Z.L., Luoni, L., Bonza, M.C., Doccua, F.G., De Michelis, M.I., Morris, R.J., Schwarzlander, M., and Costa, A. (2018). Cellular Ca<sup>2+</sup> Signals Generate Defined pH Signatures in Plants. *Plant Cell* **30**, 2704-2719.**

- De Col, V., Fuchs, P., Nietzel, T., Elsässer, M., Voon, C.P., Candeo, A., Seeliger, I., Fricker, M.D., Grefen, C., Møller, I.M., Bassi, A., Lim, B.L., Zancani, M., Meyer, A.J., Costa, A., Wagner, R., and Schwarzländer, M.** (2017). ATP sensing in living plant cells reveals tissue gradients and stress dynamics of energy physiology. *eLife* **6**, 26770.
- Haber, Z., Lampl, N., Meyer, A.J., Zelinger, E., Hipsch, M., and Rosenwasser, S.** (2021). Resolving diurnal dynamics of the chloroplastic glutathione redox state in *Arabidopsis* reveals its photosynthetically-derived oxidation. *The Plant Cell* **33**, 1828-1844.
- Lim, S.L., Voon, C.P., Guan, X., Yang, Y., Gardestrom, P., and Lim, B.L.** (2020). *In planta* study of photosynthesis and photorespiration using NADPH and NADH/NAD<sup>+</sup> fluorescent protein sensors. *Nat Commun* **11**, 3238.
- Lima, V.F., Erban, A., Daubermann, A.G., Freire, F.B.S., Porto, N.P., Cândido-Sobrinho, S.A., Medeiros, D.B., Schwarzländer, M., Fernie, A.R., dos Anjos, L., Kopka, J., and Daloso, D.M.** (2021). Establishment of a GC-MS-based <sup>13</sup>C-positional isotopomer approach suitable for investigating metabolic fluxes in plant primary metabolism. *The Plant Journal* **108**, 1213-1233.
- Née, G., Zaffagnini, M., Trost, P., and Issakidis-Bourguet, E.** (2009). Redox regulation of chloroplastic glucose-6-phosphate dehydrogenase: A new role for f-type thioredoxin. *FEBS letters* **583**, 2827-2832.
- Shameer, S., Ratcliffe, R.G., and Sweetlove, L.J.** (2019). Leaf energy balance requires mitochondrial respiration and export of chloroplast NADPH in the light. *Plant Physiology* **180**, 1947-1961.
- Voon, C.P., Guan, X., Sun, Y., Sahu, A., Chan, M.N., Gardeström, P., Wagner, S., Fuchs, P., Nietzel, T., Versaw, W.K., Schwarzländer, M., and Lim, B.L.** (2018). ATP compartmentation in plastids and cytosol of *Arabidopsis thaliana* revealed by fluorescent protein sensing. *Proc Natl Acad Sci U S A* **115**, 10778-10787.

**<b>REVIEWERS' COMMENTS</b>**

Reviewer #1 (Remarks to the Author):

The authors have covered all my concerns. I believe the work is now suitable for publication in Nat Comm.

Reviewer #2 (Remarks to the Author):

The authors have made an excellent job of addressing all of the reviewers comments. I am satisfied with the corrections.
